# Supplementary material
Source: MDPI journal article supplement (https://www.mdpi.com/2304-6740/11/4/170)
Supplement: s1 [file s1 › inorganics-2296005-supplementary.pdf]

## **Supporting Information**

### **Mild and fast construction of Ni-based electrodes for industrial-grade water splitting**

*Zikang Lu<sup>#a</sup>, Rikai Liang<sup>#a</sup>, Yuqi Shao<sup>a</sup>, Weiju Hao<sup>a\*</sup>*

<sup>a</sup> University of Shanghai for Science and Technology, Shanghai 200093, China

\*Corresponding author.

E-mail addresses: [wjhao@usst.edu.cn](mailto:wjhao@usst.edu.cn)

<sup>#</sup> Equal to this work

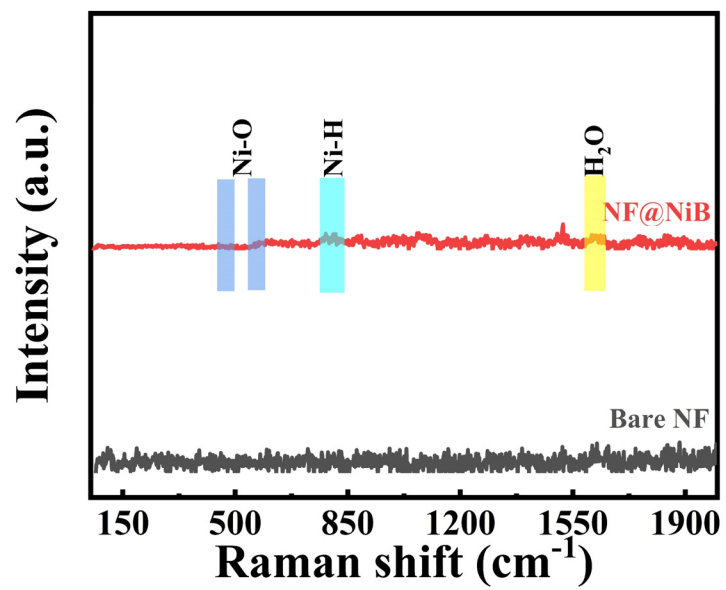

**Figure S1.** Raman spectrum of NF@NiB<sub>x</sub> and Bare NF electrodes at 532 nm excitation.

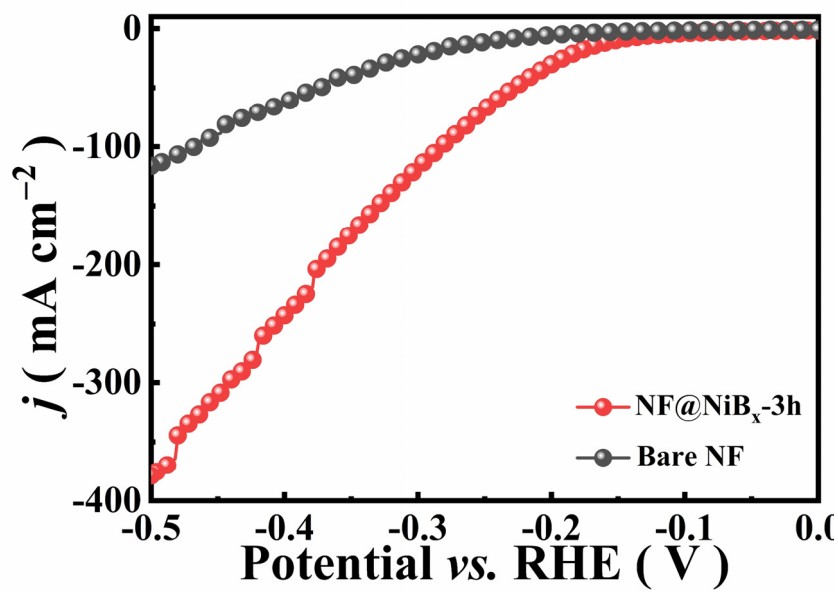

**Figure S2.** LSV curves of NF@NiB<sub>x</sub> and Bare NF electrodes for HER in 1 M KOH solution.

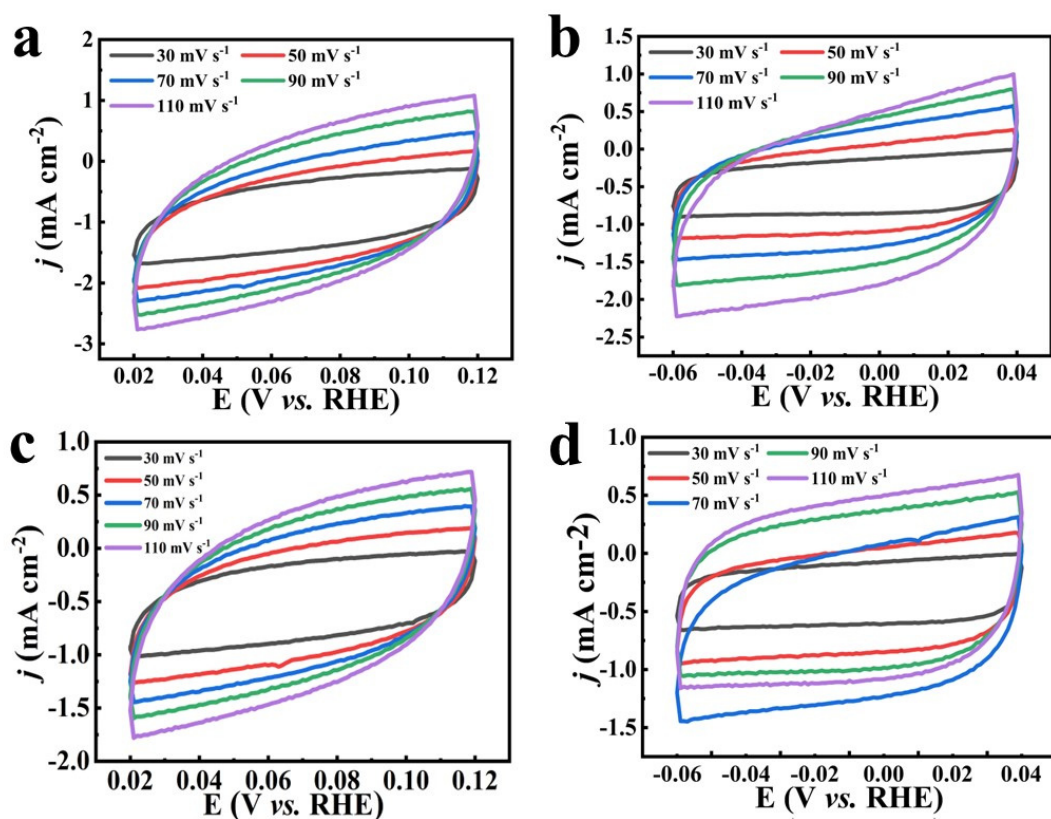

**Figure S3.** CV curves within a non-faradaic reaction region of 0.02 ~ 0.12 V (vs. RHE) at different scan rates toward HER for NF@NiB (a) and Bare NF (c); -0.06 ~ 0.04 V (vs. RHE) at different scan rates toward OER for NF@NiB (b) and Bare NF (d).

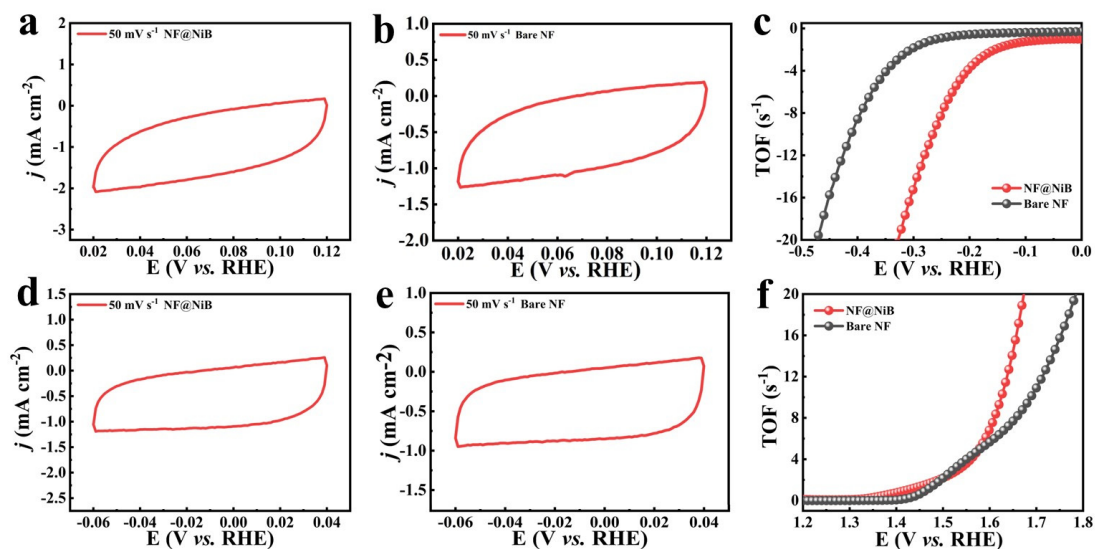

**Figure S4.** (a, b) CV curves of NF@NiB and Bare NF for HER in 1.0 M KOH + 0.5 M NaCl with a scan rate of 50 mV s<sup>-1</sup>; (d, e) CV curves of NF@NiB and Bare NF for OER in 1.0 M KOH + 0.5 M NaCl with a scan rate of 50 mV s<sup>-1</sup>; (c, f) The calculated TOFs curves for HER and OER.

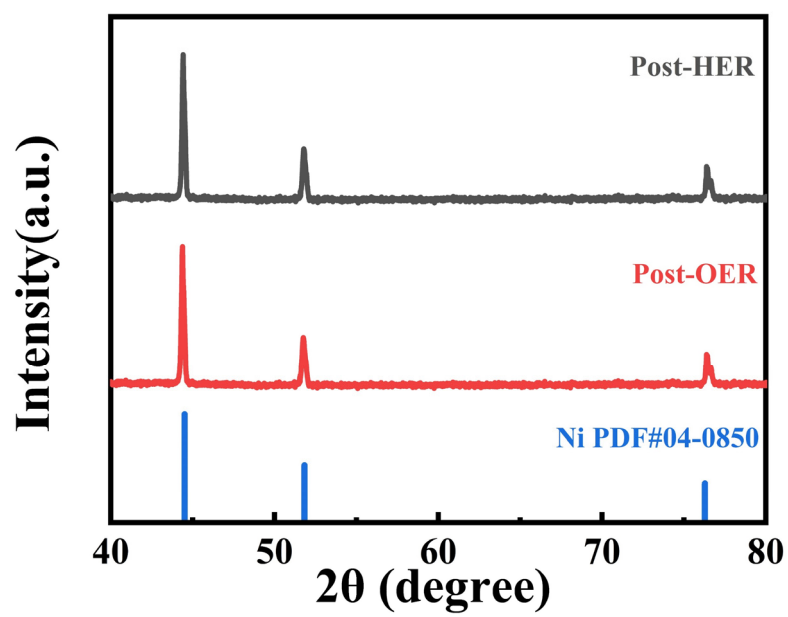

**Figure S5.** XRD spectra of NF@NiB<sub>x</sub> after HER and OER stability measurements.

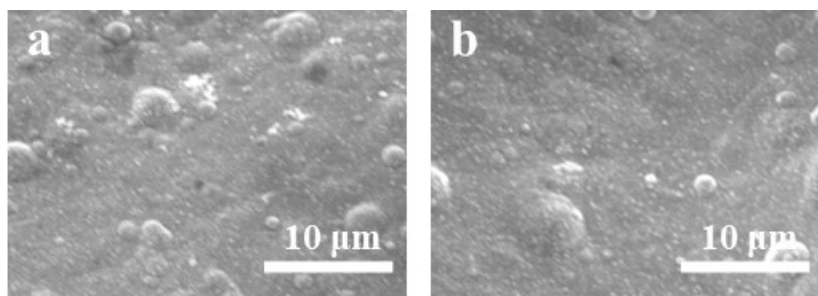

**Figure S6.** SEM images of NF@NiB after HER (a) and OER(b) stability tests.

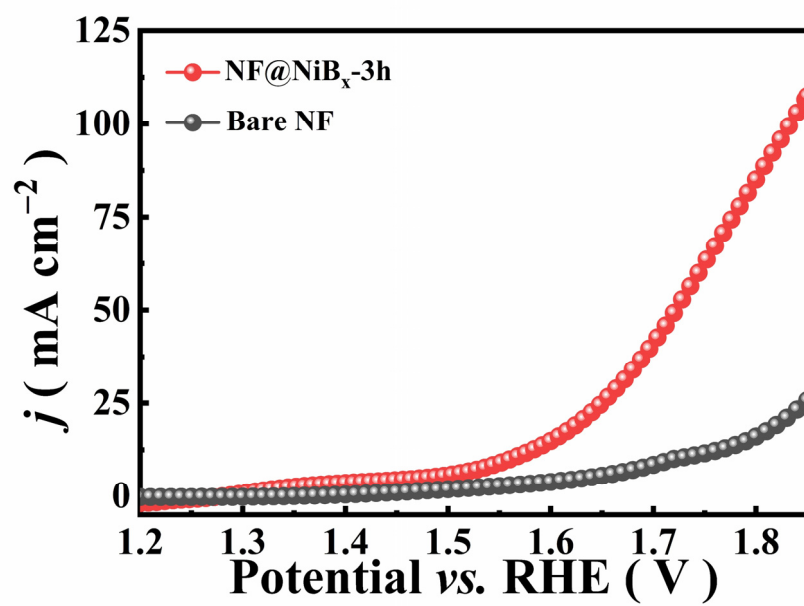

**Figure S7.** LSV curves of NF@NiB<sub>x</sub> and Bare NF electrodes for OER in 1 M KOH solution.

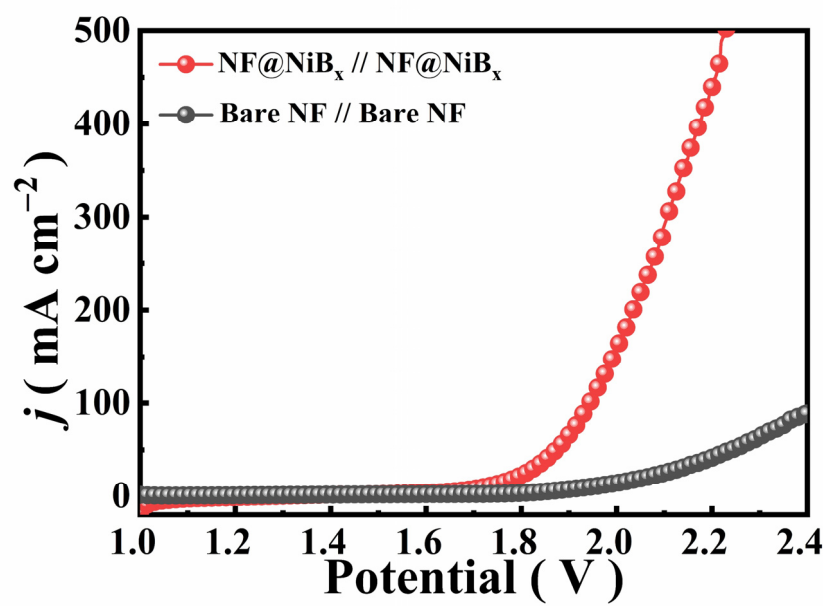

**Figure S8.** LSV curves of NF@NiB<sub>x</sub> and Bare NF electrodes for OWS in 1 M KOH solution.

**Table S1.** Comparison of overall water splitting performance of NF@NiB electrode with state-of-the-art nickel and boron series catalysts under alkaline conditions.

| Catalyst                                                                  | System                   | Voltage <sub>10</sub><br>(V) | References |
|---------------------------------------------------------------------------|--------------------------|------------------------------|------------|
| NF@NiB                                                                    | 1.0 M KOH+<br>0.5 M NaCl | 1.637                        | This work  |
| FeCoNiP@P-rGO                                                             | 1.0 M KOH                | 1.77                         | [1]        |
| Co/NBC                                                                    | 1.0 M KOH                | 1.68                         | [2]        |
| V <sub>0</sub> B-Co <sub>3</sub> O <sub>4</sub> /NF                       | 1.0 M KOH                | 1.67                         | [3]        |
| NiCo-LDH/NF                                                               | 1.0 M KOH                | 1.66                         | [4]        |
| CoFe10%-P/NF                                                              | 1.0 M KOH                | 1.61                         | [5]        |
| NiCoP/NF                                                                  | 1.0 M KOH                | 1.60                         | [6]        |
| Co <sub>2</sub> P-1/Ni <sub>2</sub> P-1@NF                                | 1.0 M KOH                | 1.63                         | [7]        |
| Cu <sub>1-x</sub> Ni <sub>x</sub> S/NF                                    | 1.0 M KOH                | 1.64                         | [8]        |
| Ni-Fe <sub>2</sub> B@NF                                                   | 1.0 M KOH                | 1.64                         | [9]        |
| CoFe-LDH/NCO/NF-1                                                         | 1.0 M KOH                | 1.65                         | [10]       |
| Fe <sub>2</sub> P/Ni <sub>1.5</sub> Co <sub>1.5</sub> N/Ni <sub>2</sub> P | 1.0 M KOH                | V <sub>100</sub> =1.624      | [11]       |
| Ni <sub>2</sub> P-Fe <sub>2</sub> P                                       | 1.0 M KOH                | V <sub>100</sub> =1.682      | [12]       |
| Co-Fe <sub>2</sub> P                                                      | 1.0 M KOH                | V <sub>100</sub> =1.69       | [13]       |
| NiMo films                                                                | 1.0 M KOH+<br>0.5 M NaCl | 1.579                        | [14]       |
| SSFF@NiFe LDH                                                             | 1.0 M KOH+<br>0.5 M NaCl | 1.76                         | [15]       |
| FeNiP/MoO <sub>x</sub> /NiMoO <sub>4</sub> /NF(-)<br>   NiFe LDH(+)       | 1.0 M KOH+<br>0.5 M NaCl | 1.47                         | [16]       |
| NiFeB@OCC                                                                 | 1.0 M KOH+<br>0.5 M NaCl | 1.72                         | [17]       |

## Reference

1. X. Ren, Y. Tian, F. Shaik, J. Yang, R. Liu, K. Guo and B. Jiang, An efficient electrocatalyst based on vertically aligned heteroatom(B/N/P/O/S)-doped graphene array integrated with FeCoNiP nanoparticles for overall water splitting, *Adv. Sust. Syst.*, 2022, 6, 2100436.
2. M.-R. Liu, Q.-L. Hong, Q.-H. Li, Y. Du, H.-X. Zhang, S. Chen, T. Zhou and J. Zhang, Cobalt boron imidazolate framework derived cobalt nanoparticles encapsulated in B/N codoped nanocarbon as efficient bifunctional electrocatalysts for overall water splitting, *Adv. Funct. Mater.*, 2018, 28, 1801136.
3. H. Yuan, S. Wang, Z. Ma, M. Kundu, B. Tang, J. Li and X. Wang, Oxygen vacancies engineered self-supported B doped Co<sub>3</sub>O<sub>4</sub> nanowires as an efficient multifunctional catalyst for electrochemical water splitting and hydrolysis of sodium borohydride, *Chem. Eng. J.*, 2021, 404, 126474.
4. W. Liu, J. Bao, M. Guan, Y. Zhao, J. Lian, J. Qiu, L. Xu, Y. Huang, J. Qian and H. Li, Nickel–cobalt-layered double hydroxide nanosheet arrays on Ni foam as a bifunctional electrocatalyst for overall water splitting, *Dalton Trans.*, 2017, 46, 8372-8376.
5. B. Liu, S. Li, T. Wang, Y. Yang, L. Wang, X. Zhang, Z. Liu and L. Niu, Construction of CoFe bimetallic phosphide microflowers electrocatalyst for highly efficient overall water splitting, *Catal. Commun.*, 2023, 175, 106607.
6. D. Wang, Y. Zhang, T. Fei, C. Mao, Y. Song, Y. Zhou and G. Dong, NiCoP/NF 1D/2D biomimetic architecture for markedly enhanced overall water splitting, *Chem. Electro. Chem.*, 2021, 8, 3064-3072.
7. H. Zhao, J. Liang and Y. Zhao, Construction of hierarchical Co<sub>2</sub>P/Ni<sub>2</sub>P heterostructures on Ni foam as efficient bifunctional electrocatalyst for overall water splitting, *J. Alloys Compd.*, 2022, 907, 164479.
8. Y. Li, H. Su, J. Fu and X. Du, The 3D ultra-thin Cu<sub>1-x</sub>Ni<sub>x</sub>S/NF nanosheet as a highly efficient and stable electrocatalyst for overall water splitting, *Int. J. Hydrogen Energy*, 2019, 44, 11744-11753.

9. R. Yao, Y. Wu, Q. Zhao, J. Li and G. Liu, Autogenous growth of highly active bifunctional Ni–Fe<sub>2</sub>B nanosheet arrays toward efficient overall water splitting, *Int. J. Hydrogen Energy*, 2022, 47, 8303-8313.
10. H. Yao, S. Wang, Y. Cao, R. Chen, Z. Lu, J. Hu, J. Xie and A. Hao, High-performance bifunctional electrocatalysts of CoFe-LDH/NiCo<sub>2</sub>O<sub>4</sub> heterostructure supported on nickel foam for effective overall water splitting, *J. Alloys Compd.*, 2022, 926, 166846.
11. F. Zhang, Y. Liu, F. Yu, H. Pang, X. Zhou, D. Li, W. Ma, Q. Zhou, Y. Mo and H. Zhou, Engineering Multilevel Collaborative Catalytic Interfaces with Multifunctional Iron Sites Enabling High-Performance Real Seawater Splitting, *ACS Nano*, 2023, 17, 1681-1692.
12. L. Wu, L. Yu, F. Zhang, B. McElhenny, D. Luo, A. Karim, S. Chen and Z. Ren, Heterogeneous Bimetallic Phosphide Ni<sub>2</sub>P-Fe<sub>2</sub>P as an Efficient Bifunctional Catalyst for Water/Seawater Splitting, *Adv. Funct. Mater.*, 2021, 31, 2006484.
13. S. Wang, P. Yang, X. Sun, H. Xing, J. Hu, P. Chen, Z. Cui, W. Zhu and Z. Ma, Synthesis of 3D heterostructure Co-doped Fe<sub>2</sub>P electrocatalyst for overall seawater electrolysis, *Appl. Catal. B-Environ.*, 2021, 297, 120386.
14. W. Yuan, Z. Cui, S. Zhu, Z. Li, S. Wu and Y. Liang, Structure engineering of electrodeposited NiMo films for highly efficient and durable seawater splitting, *Electrochimica Acta*, 2021, 365, 137366.
15. Y. Liu, Z. Song, Z. Li, M. Han, Y. Cheng and Z. Zheng, Standing NiFe LDH nanosheets on stainless steel fibers felt: A synergistic impact on the oxygen evolution reaction (OER) for the water splitting, *Catal. Commun.*, 2022, 164, 106425.
16. Z. Xiao, M. Yang, J. Wang, Z. Xu, S. Zhang, A. Tang, R. Gao and H. Yang, FeNiP/MoO<sub>x</sub> integrated electrode grown on monocrystalline NiMoO<sub>4</sub> nanorods with multi-interface for accelerating alkaline hydrogen evolution reaction, *Appl. Catal. B-Environ.*, 2022, 303, 120913.
17. A. Kafle, D. Gupta and T. C. Nagaiah, Facile fabrication of NiFeB deposited flexible carbon cloth electrode towards overall water splitting in alkaline and

saline solutions, *Electrochimica Acta*, 2023, 441, 141779.
